# Supplementary material for: Controllable inverse C2H2/CO2 separation in ultra-stable Zn-organic frameworks for efficient removal of trace CO2 from acetylene
Source: Royal Society of Chemistry journal article supplement (doi:10.1039/d2ta07473g), 2022-01-01
Supplement: d2ta07473g2.pdf [file d2ta07473g2.pdf]

## Electronic Supplementary Information

### **Controllable Inverse C<sub>2</sub>H<sub>2</sub>/CO<sub>2</sub> Separation in Ultra-Stable Zn-Organic Frameworks for Efficient Removal of Trace CO<sub>2</sub> from Acetylene**

Jia Yu, Jing Zhang, Peng Zhang\*, Ying Wang, Shu-Ni Li, Quan-Guo Zhai\*

Key Laboratory of Macromolecular Science of Shaanxi Province, School of  
Chemistry & Chemical Engineering, Shaanxi Normal University, Xi'an, Shaanxi,  
710062, China.

\*Corresponding authors

E-mail: peng.zhang@snnu.edu.cn, zhaiqg@snnu.edu.cn.

**Table S1.** Crystal data and structure refinements for SNNU-334-336.

| MOF                                                                                                   | SNNU-334                                                                       | SNNU-335                                                                        | SNNU-336                                                                       |
|-------------------------------------------------------------------------------------------------------|--------------------------------------------------------------------------------|---------------------------------------------------------------------------------|--------------------------------------------------------------------------------|
| Empirical formula                                                                                     | C <sub>58</sub> H <sub>34</sub> N <sub>8</sub> O <sub>12</sub> Zn <sub>3</sub> | C <sub>60</sub> H <sub>42</sub> N <sub>12</sub> O <sub>12</sub> Zn <sub>3</sub> | C <sub>60</sub> H <sub>36</sub> N <sub>6</sub> O <sub>12</sub> Zn <sub>3</sub> |
| Formula weight                                                                                        | 1231.04                                                                        | 1319.24                                                                         | 1229.15                                                                        |
| Crystal system                                                                                        | Cubic                                                                          | Cubic                                                                           | Cubic                                                                          |
| Space group                                                                                           | <i>Pa-3</i>                                                                    | <i>Pa-3</i>                                                                     | <i>Pa-3</i>                                                                    |
| <i>a</i> (Å)                                                                                          | 23.620(2)                                                                      | 23.978(2)                                                                       | 23.941(2)                                                                      |
| <i>b</i> (Å)                                                                                          | 23.620(2)                                                                      | 23.978(2)                                                                       | 23.941(2)                                                                      |
| <i>c</i> (Å)                                                                                          | 23.620(9)                                                                      | 23.978(2)                                                                       | 23.941(2)                                                                      |
| $\alpha$ (deg)                                                                                        | 90                                                                             | 90                                                                              | 90                                                                             |
| $\beta$ (deg)                                                                                         | 90                                                                             | 90                                                                              | 90                                                                             |
| $\gamma$ (deg)                                                                                        | 90                                                                             | 90                                                                              | 90                                                                             |
| Volume (Å <sup>3</sup> )                                                                              | 13177.7(19)                                                                    | 13786(2)                                                                        | 13722.5(2)                                                                     |
| <i>Z</i>                                                                                              | 8                                                                              | 24                                                                              | 24                                                                             |
| <i>d</i> <sub>calcd.</sub> (g·m <sup>-3</sup> )                                                       | 1.241                                                                          | 1.2711                                                                          | 1.1898                                                                         |
| Wavelength                                                                                            | 0.71073 Å                                                                      | 0.71073 Å                                                                       | 0.71073 Å                                                                      |
| <i>F</i> (000)                                                                                        | 4992                                                                           | 4992                                                                            | 4992                                                                           |
| R <sub>int</sub>                                                                                      | 0.1165                                                                         | 0.0465                                                                          | 0.0669                                                                         |
| Reflections collected/unique                                                                          | 65062/3891                                                                     | 440377/4685                                                                     | 438629/4679                                                                    |
| Data/restraints/parameters                                                                            | 3891/9/261                                                                     | 4685/0/263                                                                      | 4679/0/244                                                                     |
| GOF on <i>F</i> <sup>2</sup>                                                                          | 1.036                                                                          | 1.445                                                                           | 1.142                                                                          |
| <i>R</i> <sub>1</sub> <sup>a</sup> , <i>wR</i> <sub>2</sub> <sup>b</sup> [ <i>I</i> > 2σ( <i>I</i> )] | 0.056, 0.1460                                                                  | 0.0857, 0.2941                                                                  | 0.0436, 0.1454                                                                 |
| <i>R</i> <sub>1</sub> <sup>a</sup> , <i>wR</i> <sub>2</sub> <sup>b</sup> (all data)                   | 0.1261, 0.1334                                                                 | 0.0866, 0.2823                                                                  | 0.046, 0.143                                                                   |

$${}^a R_1 = \sum(|F_o| - |F_c|) / \sum|F_o|, \quad {}^b wR_2 = [\sum w(F_o^2 - F_c^2)^2 / \sum w(F_o^2)^2]^{0.5}$$

**Table S2.** Selected bond lengths (Å) and bond angles (°) of SNNU-334-336.

| SNNU-334    |            | SNNU-335   |            | SNNU-336   |            |
|-------------|------------|------------|------------|------------|------------|
| Zn1-N1      | 2.014(4)   | Zn1-N1     | 2.037(3)   | Zn1-N1     | 2.035(2)   |
| Zn1-N3      | 2.012(4)   | Zn1-N2     | 2.040(3)   | Zn1-N2     | 2.037(2)   |
| Zn1-O1      | 1.914(3)   | Zn1-O1     | 1.947(3)   | Zn1-O1     | 1.9399(19) |
| Zn1-O3      | 1.900(4)   | Zn1-O3     | 1.956(3)   | Zn1-O3     | 1.9533(19) |
| O1-Zn1-O3   | 106.06(18) | O1-Zn1-O3  | 103.61(14) | O1-Zn1-O3  | 105.13(9)  |
| N1-Zn1-N3   | 107.28(19) | N1-Zn1-N2  | 109.01(14) | N1-Zn1-N2  | 109.31(9)  |
| O1-Zn1-N1   | 114.54(17) | O1-Zn1-N1  | 96.41(14)  | O1-Zn1-N1  | 97.54(9)   |
| O1-Zn1-N3   | 113.88(18) | O1-Zn1-N2  | 117.68(14) | O1-Zn1-N2  | 116.61(9)  |
| O3-Zn1-N1   | 116.8(2)   | O3-Zn1-N1  | 112.81(14) | O3-Zn1-N1  | 112.89(9)  |
| O3-Zn1-N3   | 97.2(2)    | O3-Zn1-N2  | 115.77(14) | O3-Zn1-N2  | 114.25(9)  |
| C15-O1-Zn1  | 108.3(4)   | C15-O1-Zn1 | 123.9(3)   | C15-O3-Zn1 | 107.57(18) |
| C18-O3-Zn1  | 124.3(5)   | C18-O3-Zn1 | 106.8(3)   | C18-O1-Zn1 | 124.42(18) |
| C1-N1-Zn1   | 122.9(4)   | C1-N1-Zn1  | 123.3(3)   | C1-N2-Zn1  | 119.96(18) |
| C3-N8-Zn1   | 118.8(5)   | C5-N1-Zn1  | 119.7(2)   | C5-N2-Zn1  | 121.62(19) |
| C5-N1-Zn1   | 119.8(4)   | C8-N2-Zn1  | 122.3(3)   | C8-N1-Zn1  | 123.70(18) |
| C8'-N3-Zn1  | 118.7(14)  | C12-N2-Zn1 | 119.7(3)   | C12-N1-Zn1 | 118.60(18) |
| C12-N3-Zn1  | 125.2(5)   |            |            |            |            |
| C12'-N3-Zn1 | 127.9(14)  |            |            |            |            |

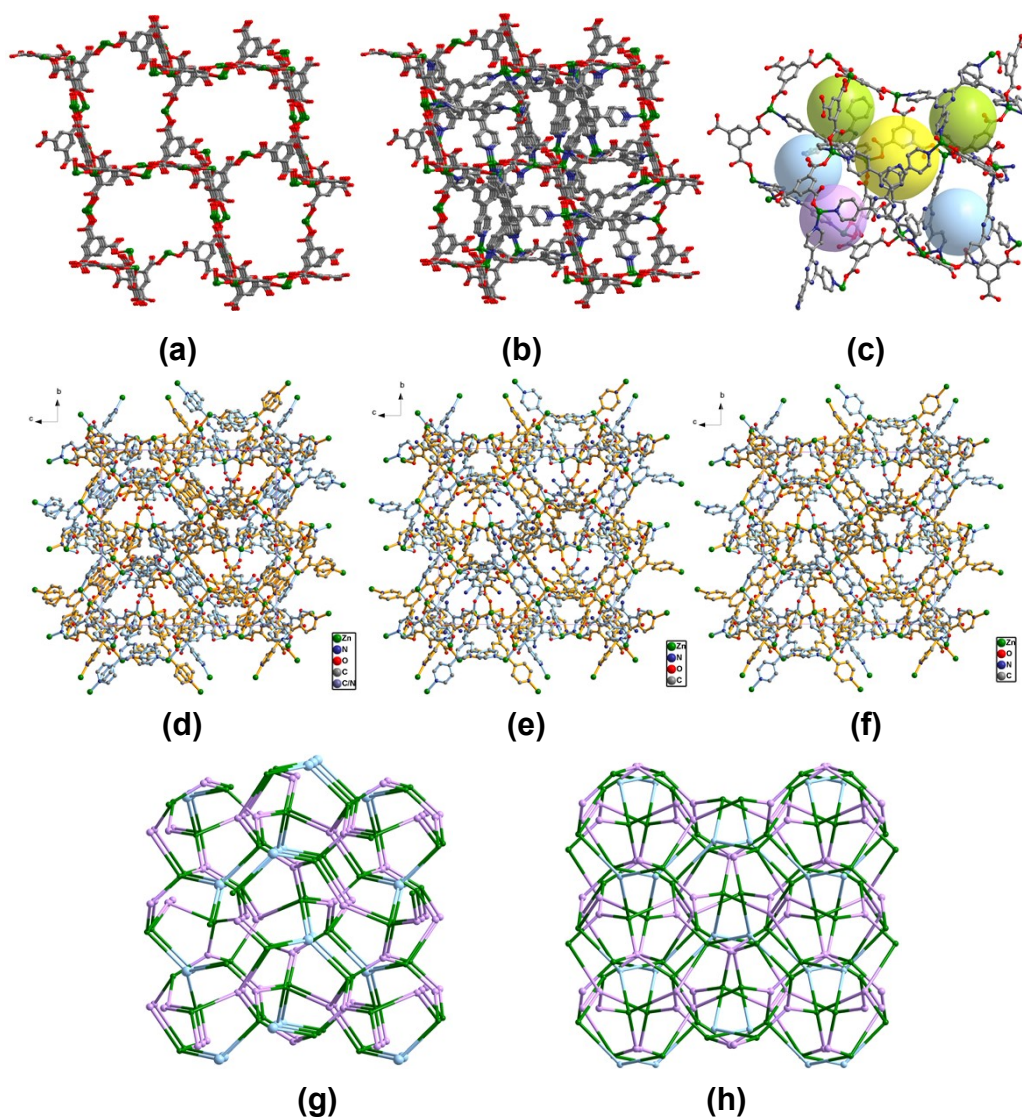

**Figure S1.** (a) The structure generated by  $\text{Zn}^{2+}$  and BTC ligands in SNNU-334-336. (b) The 3D framework formed by the further coordination with tri-pyridine ligands. (c) The linkage between four types of metal-organic cages. (d-f) The 2-fold interpenetrated frameworks of SNNU-334-336 viewed along the a-axis direction. (g and h) The topological representations for the single and 2-fold interpenetrated metal-organic frameworks.

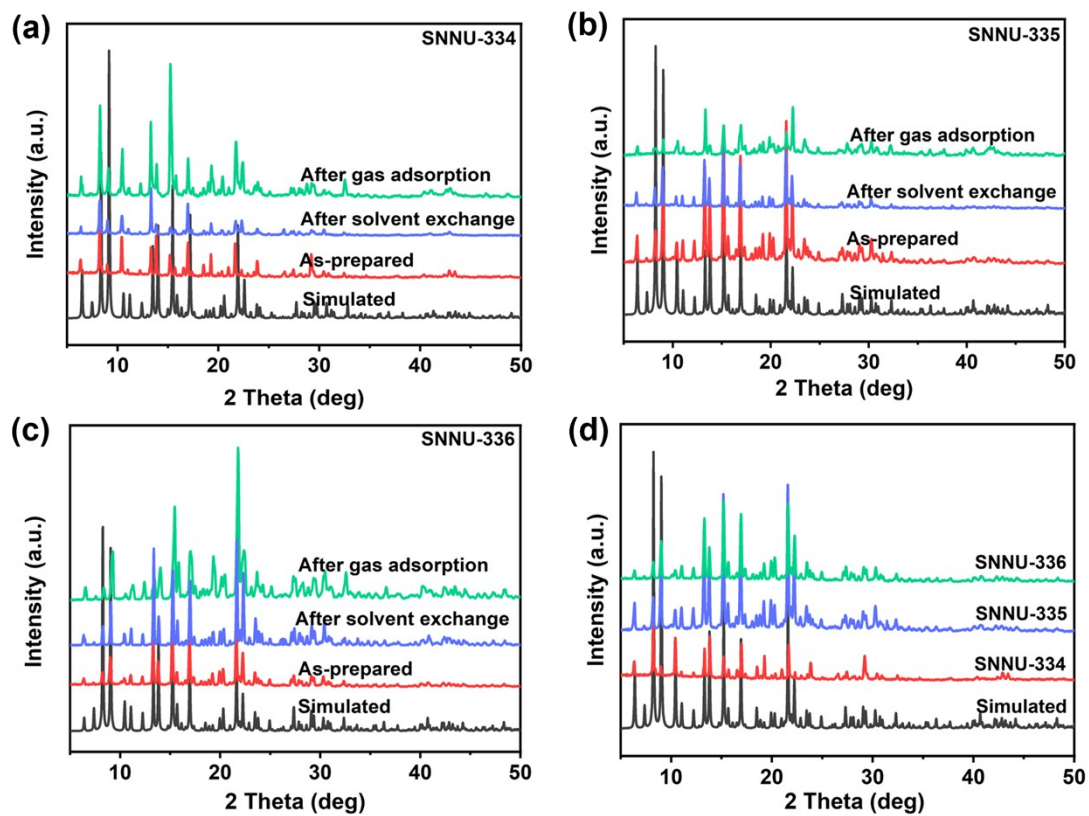

**Figure S2.** PXRD patterns of SNNU-334-336.

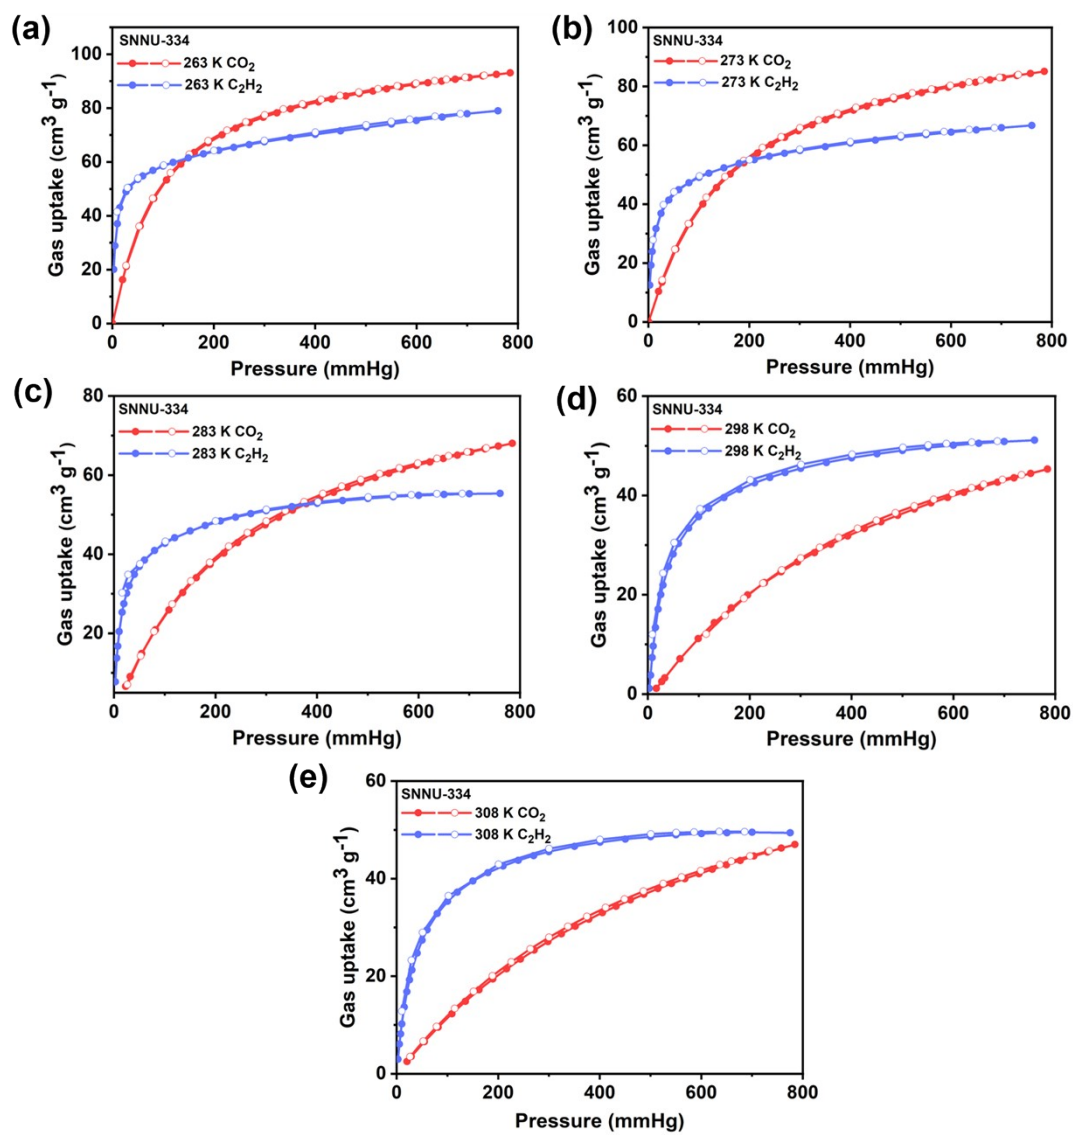

**Figure S3.** The adsorption curves of CO<sub>2</sub> and C<sub>2</sub>H<sub>2</sub> for SNNU-334 at 263 K-308 K.

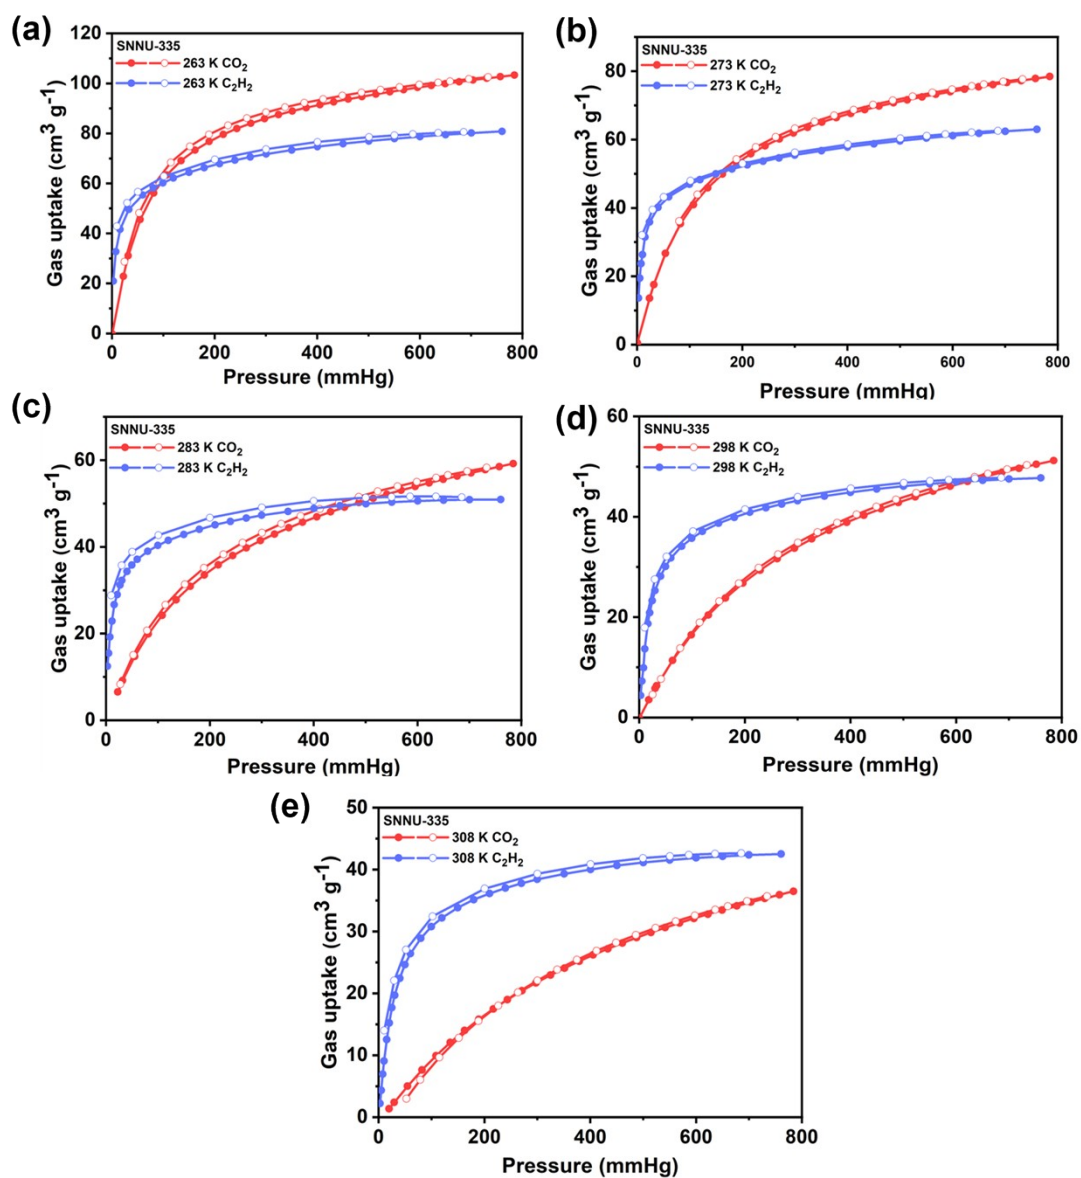

**Figure S4.** The adsorption curves of CO<sub>2</sub> and C<sub>2</sub>H<sub>2</sub> for SNNU-335 at 263 K-308 K.

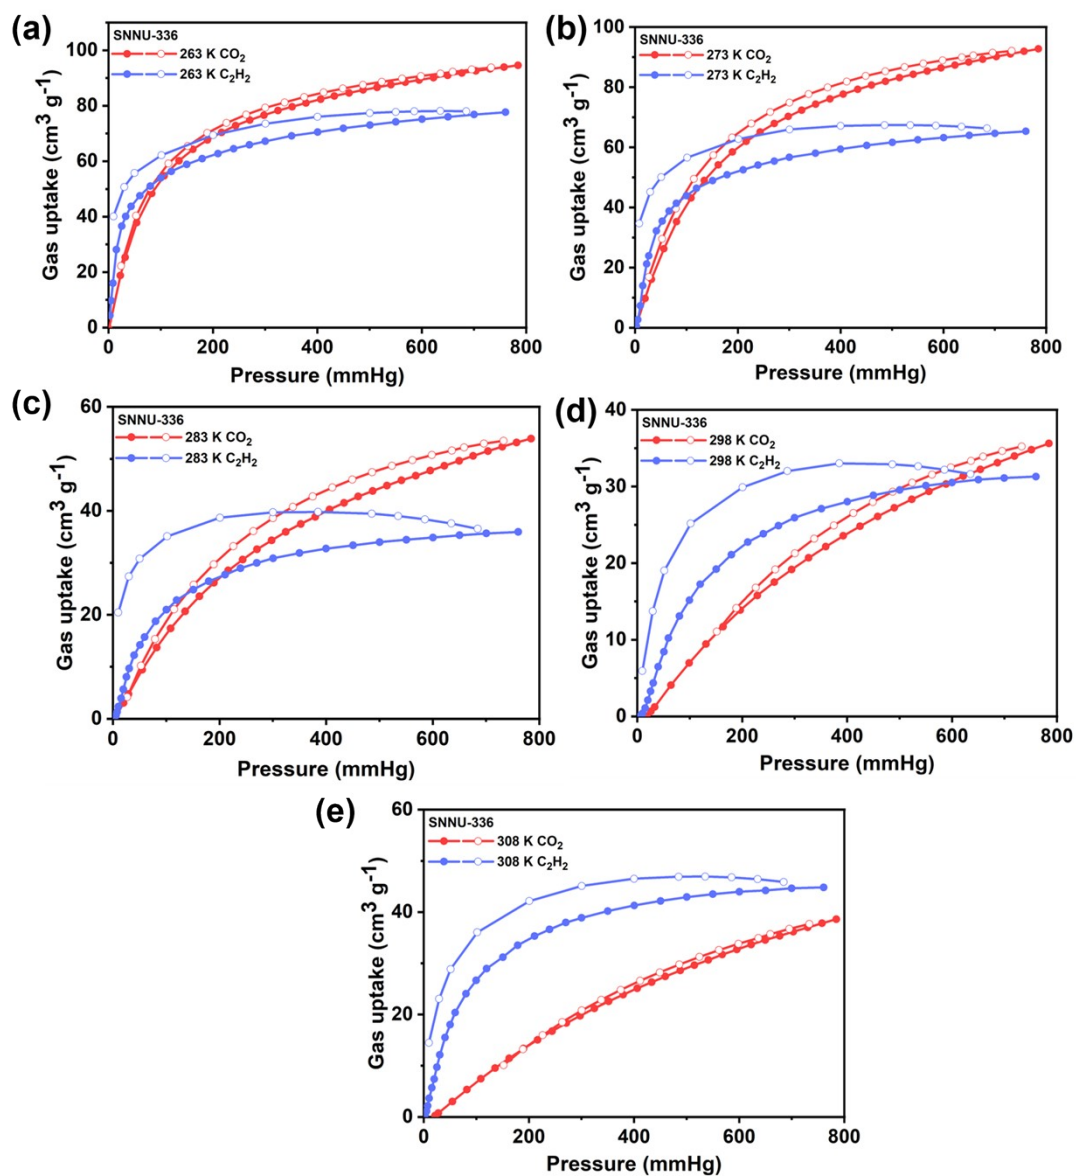

**Figure S5.** The adsorption curves of CO<sub>2</sub> and C<sub>2</sub>H<sub>2</sub> for SNNU-336 at 263 K-308 K.



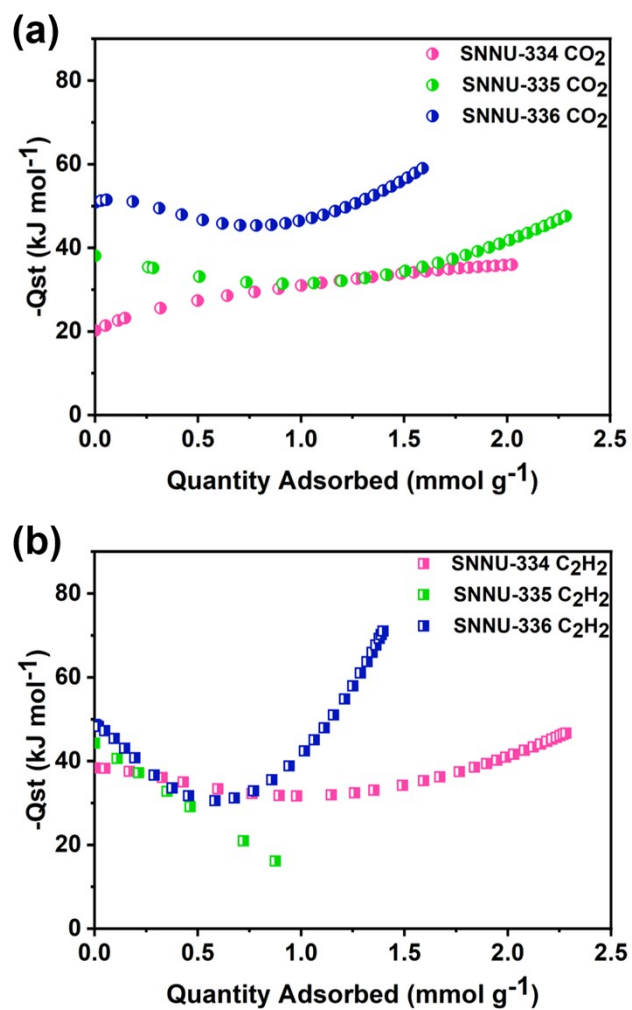

**Figure S6.** The calculated  $Q_{st}$  values for SNNU-334-336 of CO<sub>2</sub> (a) and C<sub>2</sub>H<sub>2</sub> (b).

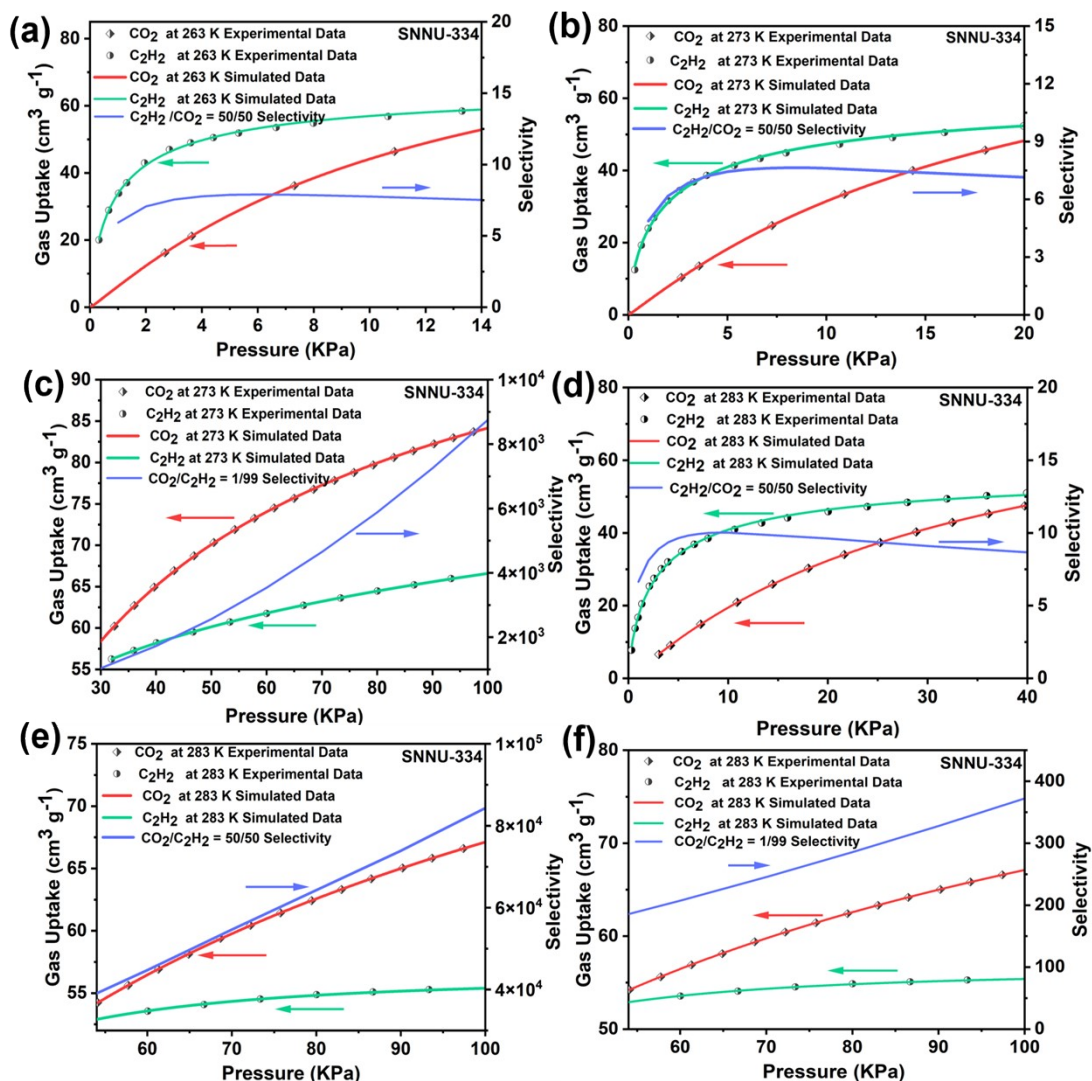

**Figure S7.** IAST selectivity data for SNNU-334: (a) C<sub>2</sub>H<sub>2</sub>/CO<sub>2</sub> = 50/50 before reverse point at 263 K; (b) C<sub>2</sub>H<sub>2</sub>/CO<sub>2</sub> = 50/50 before reverse point 273 K; (c) CO<sub>2</sub>/C<sub>2</sub>H<sub>2</sub> = 1/99 at 273 K after reverse point; (d) C<sub>2</sub>H<sub>2</sub>/CO<sub>2</sub> = 50/50 at 283 K before reverse point; (e) CO<sub>2</sub>/C<sub>2</sub>H<sub>2</sub> = 50/50 after reverse point; (f) CO<sub>2</sub>/C<sub>2</sub>H<sub>2</sub> = 1/99 at 283 K after reverse point.

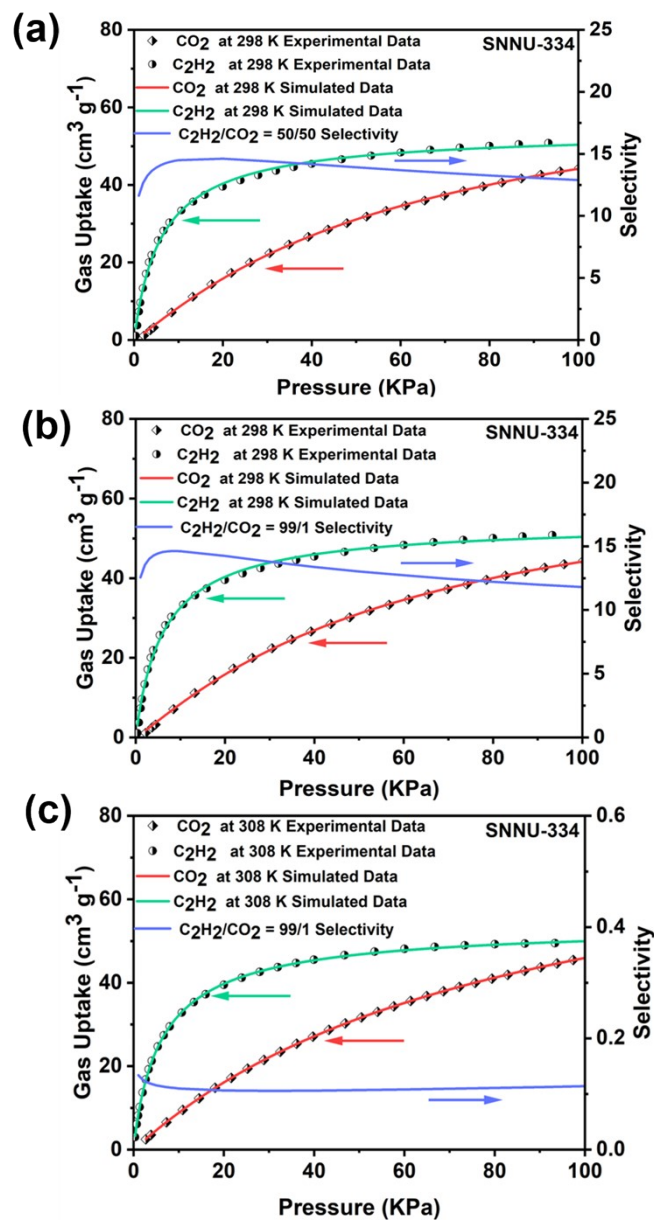

**Figure S8.** IAST selectivity data for SNNU-334: (a)  $\text{C}_2\text{H}_2/\text{CO}_2 = 50/50$  at 298 K; (b)  $\text{C}_2\text{H}_2/\text{CO}_2 = 1/99$  at 298 K; (c)  $\text{C}_2\text{H}_2/\text{CO}_2 = 1/99$  at 308 K.

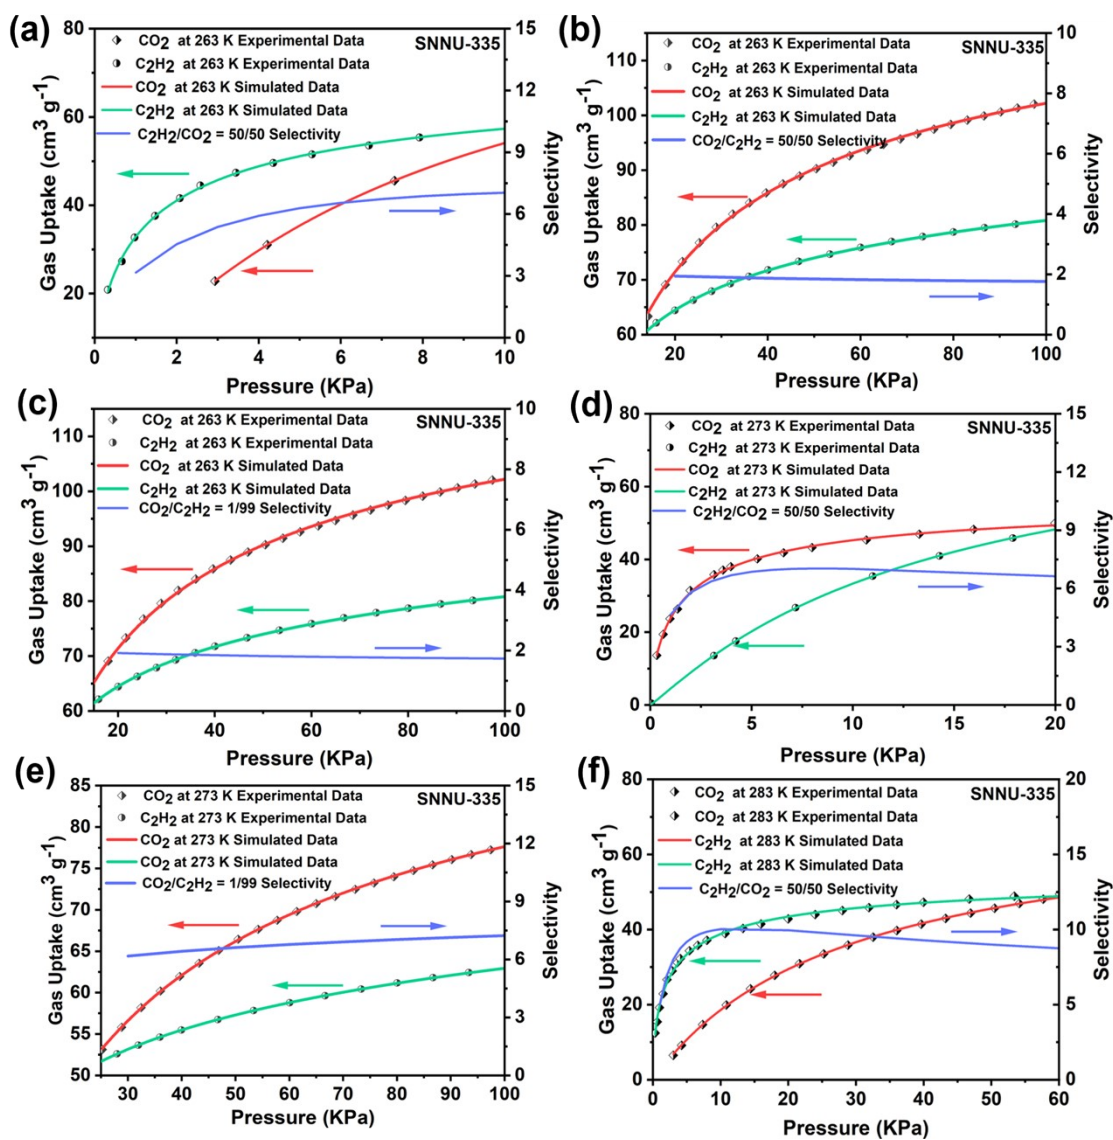

**Figure S9.** IAST selectivity data for SNNU-335: (a) C<sub>2</sub>H<sub>2</sub>/CO<sub>2</sub> = 50/50 before reverse point at 263 K; (b) C<sub>2</sub>H<sub>2</sub>/CO<sub>2</sub> = 50/50 after reverse point at 263 K; (c) CO<sub>2</sub>/C<sub>2</sub>H<sub>2</sub> = 1/99 after reverse point at 273 K; (d) C<sub>2</sub>H<sub>2</sub>/CO<sub>2</sub> = 50/50 before reverse point at 273 K; (e) CO<sub>2</sub>/C<sub>2</sub>H<sub>2</sub> = 1/99 after reverse point at 273 K; (f) C<sub>2</sub>H<sub>2</sub>/CO<sub>2</sub> = 50/50 before reverse point at 283 K.

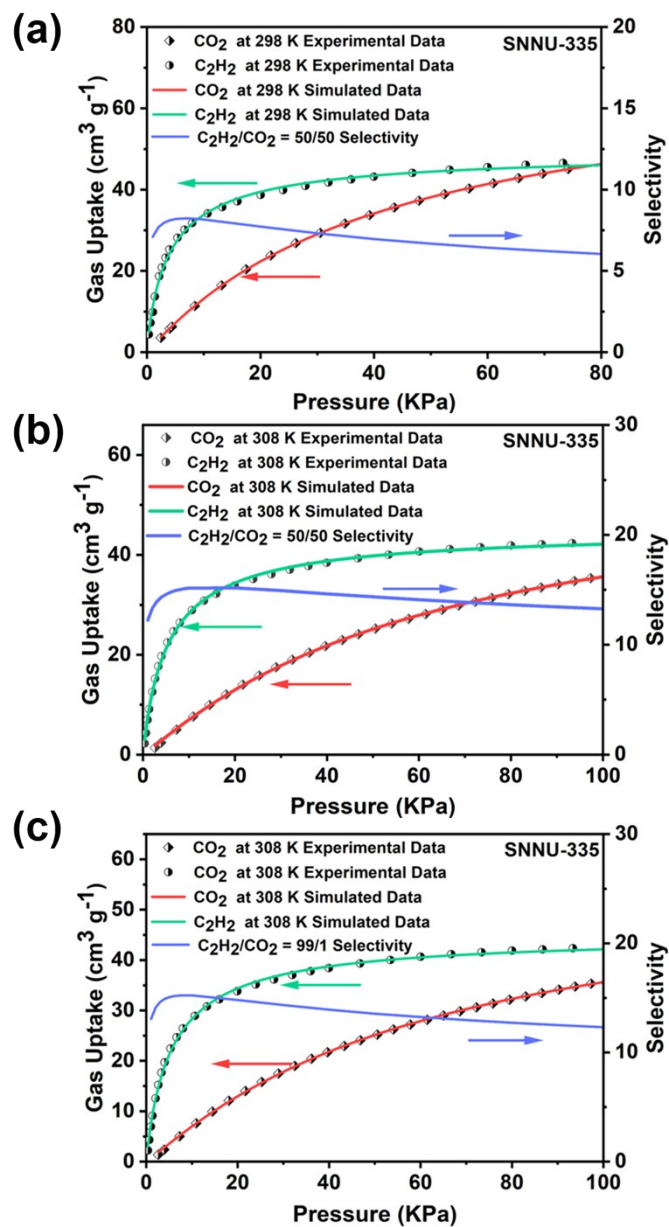

**Figure S10.** IAST selectivity data for SNNU-335: (a)  $\text{C}_2\text{H}_2/\text{CO}_2 = 50/50$  at 298 K; (b)  $\text{C}_2\text{H}_2/\text{CO}_2 = 50/50$  at 308 K; (c)  $\text{C}_2\text{H}_2/\text{CO}_2 = 99/1$  at 308 K.

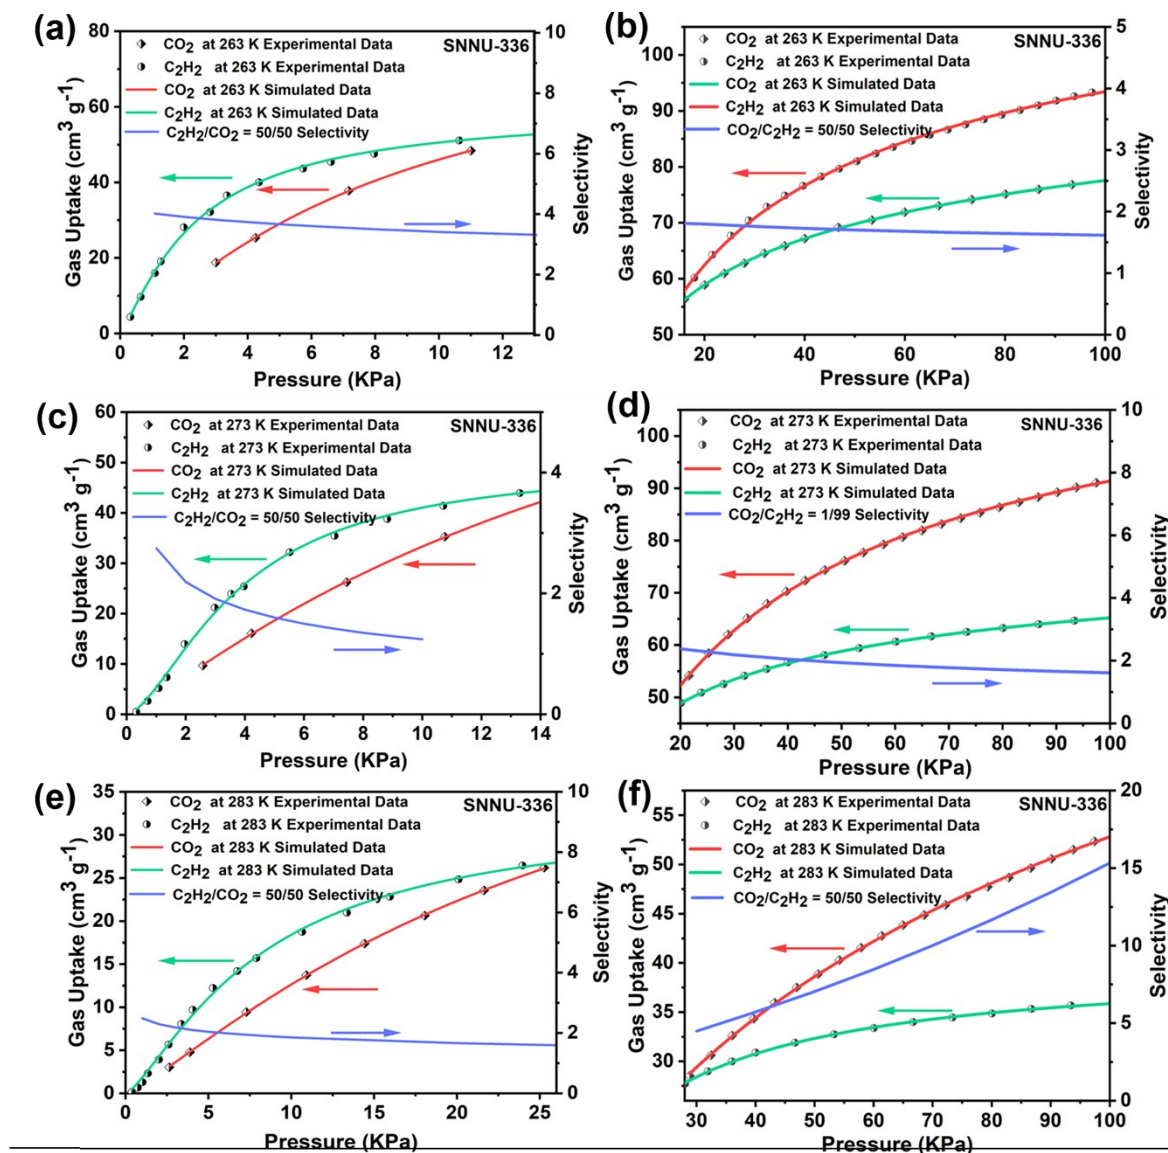

**Figure S11.** IAST selectivity data for SNNU-336: (a)  $\text{C}_2\text{H}_2/\text{CO}_2=50/50$  before reverse point at 263 K; (b)  $\text{CO}_2/\text{C}_2\text{H}_2 = 50/50$  after reverse point at 263 K; (c)  $\text{C}_2\text{H}_2/\text{CO}_2 = 50/50$  before reverse point at 273 K; (d)  $\text{CO}_2/\text{C}_2\text{H}_2 = 1/99$  after reverse point at 273 K; (e)  $\text{C}_2\text{H}_2/\text{CO}_2 = 50/50$  before reverse point at 283 K; (f)  $\text{CO}_2/\text{C}_2\text{H}_2 = 50/50$  after reverse point at 283 K.

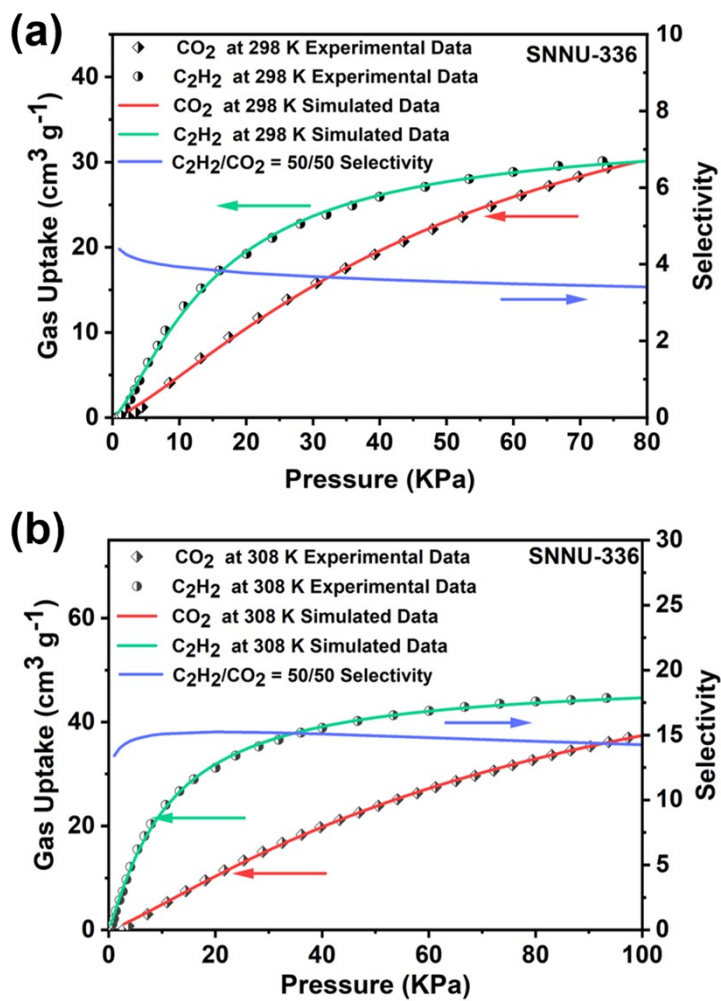

**Figure S12.** IAST selectivity data for SNNU-336: C<sub>2</sub>H<sub>2</sub>/CO<sub>2</sub> = 50/50 at 298 K (a) and 308 K (b).

## **Breakthrough Experiments and Procedures**

The breakthrough experiments are carried out in a dynamic equipment, which is built in cooperation with the instrument supplier (Xi'an Sirius Scientific Research Instrument Co., Ltd.). The activated MOF samples (SNNU-334: 730.5 mg; SNNU-335: 546.3 mg; SNNU-336: 780.0 mg) were loaded into a stainless-steel column with an inner diameter of about 4 mm, and both ends were sealed with absorbent cotton. The column was placed in a circulating catheter sleeve connected to a thermostatic bath (temperature range from 263 K to 298 K). The flow and pressure of the mixed gas are controlled by the pressure control valve and the mass flow controller, respectively. Outlet effluent was continuously monitored using a mass spectrometer (Hiden, HPR-20) or gas chromatography (Fuli Instruments, 9790II). Before the start of each breakthrough experiment, the sample column was purged with He flow ( $30 \text{ mL min}^{-1}$ ) for 3-5 h to further activate the sample.



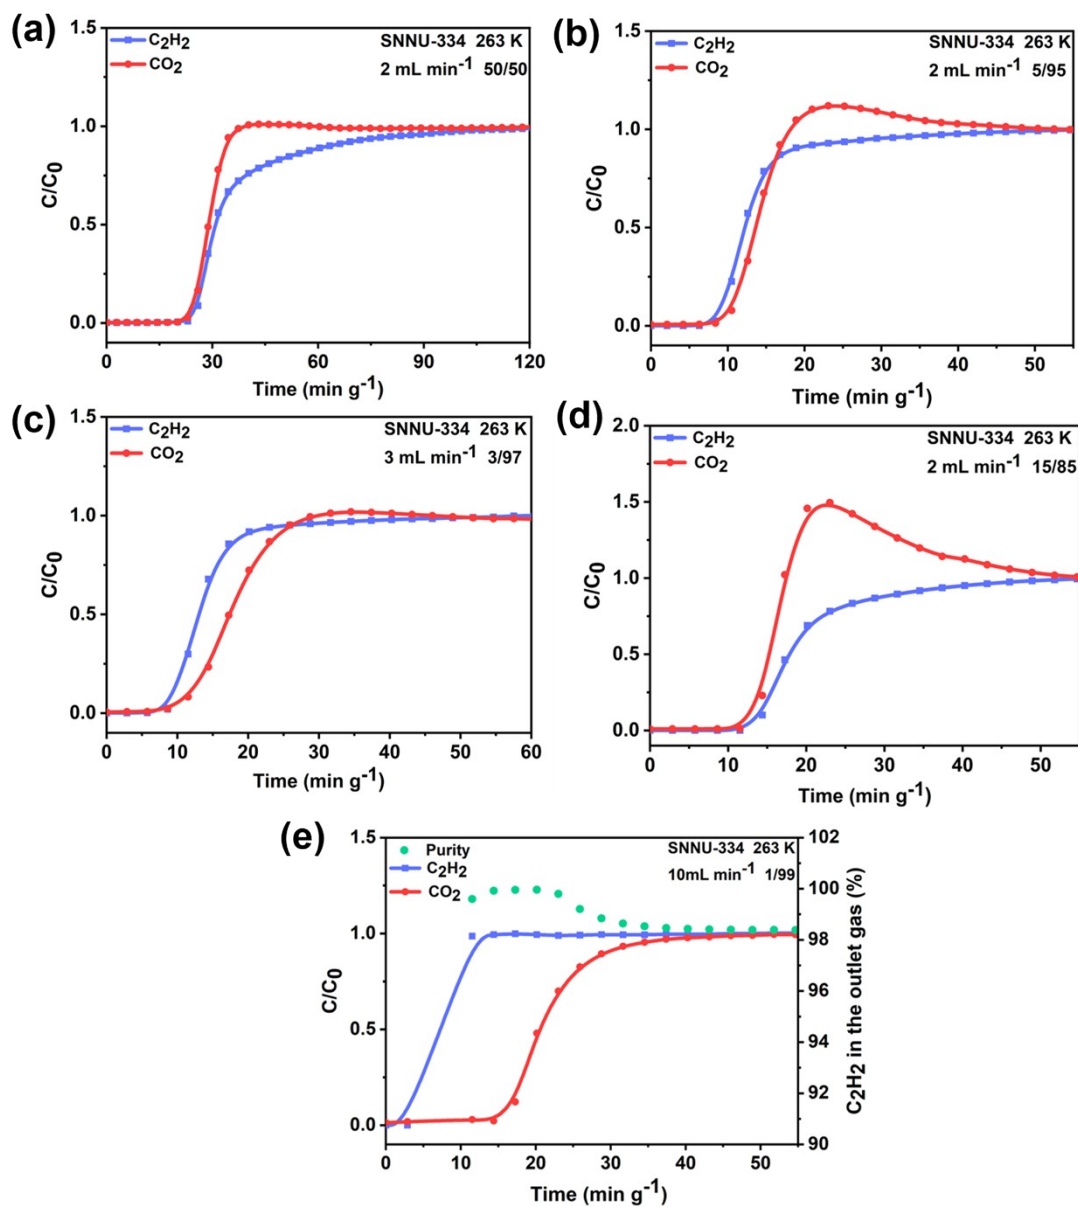

**Figure S13.** Experimental breakthrough curves of SNNU-334 at 263 K: (a)  $\text{CO}_2/\text{C}_2\text{H}_2 = 50/50$ ; (b)  $\text{CO}_2/\text{C}_2\text{H}_2 = 5/95$ ; (c)  $\text{CO}_2/\text{C}_2\text{H}_2 = 3/97$ ; (d)  $\text{CO}_2/\text{C}_2\text{H}_2 = 15/85$ ; (e)  $\text{CO}_2/\text{C}_2\text{H}_2 = 1/99$ .

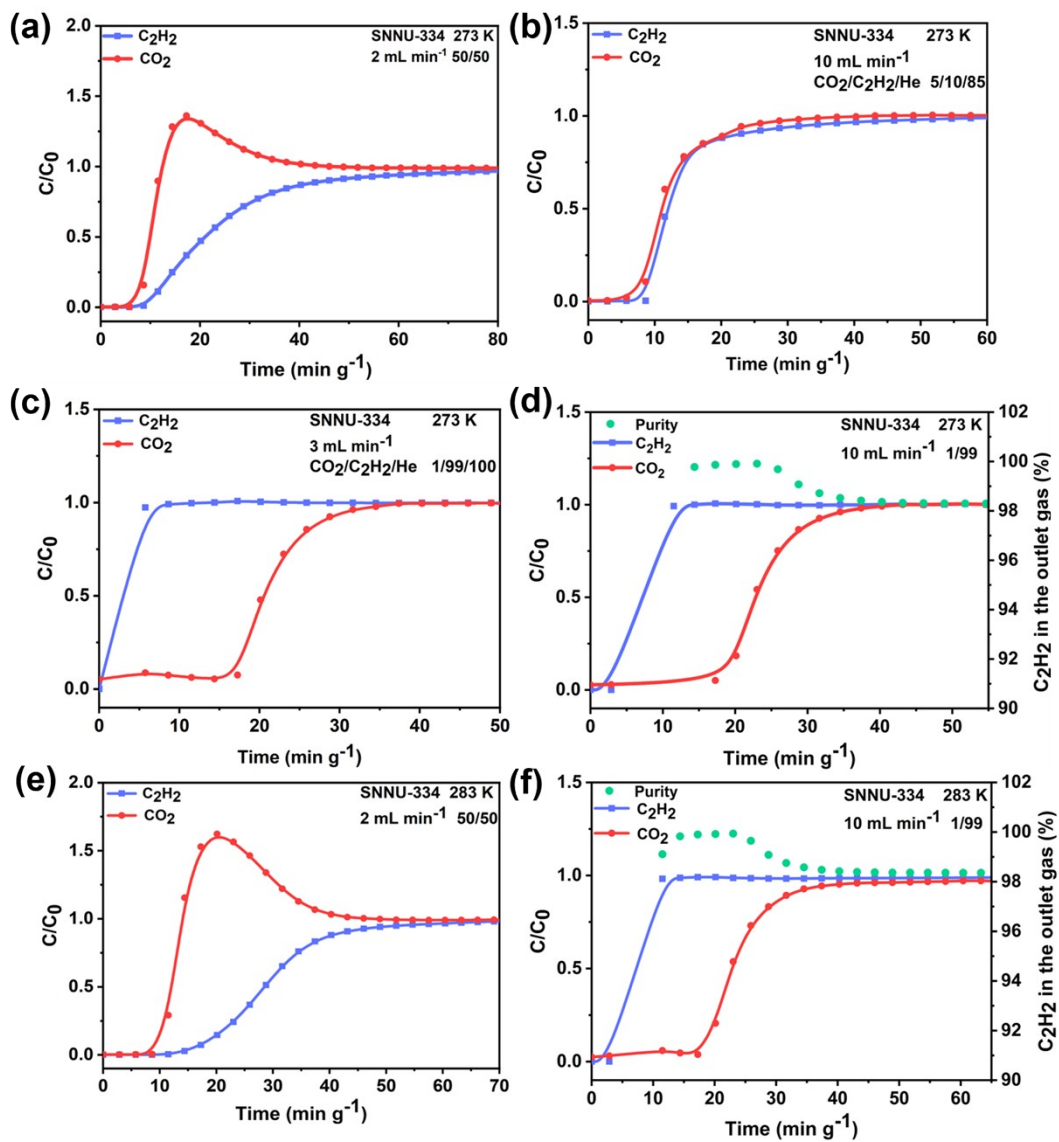

**Figure S14.** Experimental breakthrough curves of SNNU-334: (a)  $\text{CO}_2/\text{C}_2\text{H}_2 = 50/50$ ; (b)  $\text{CO}_2/\text{C}_2\text{H}_2/\text{He} = 5/10/85$ ; (c)  $\text{CO}_2/\text{C}_2\text{H}_2/\text{He} = 1/99/100$ ; (d)  $\text{CO}_2/\text{C}_2\text{H}_2 = 1/99$  at 273 K; (e)  $\text{CO}_2/\text{C}_2\text{H}_2 = 50/50$ ; (f)  $\text{CO}_2/\text{C}_2\text{H}_2 = 1/99$  at 283 K.

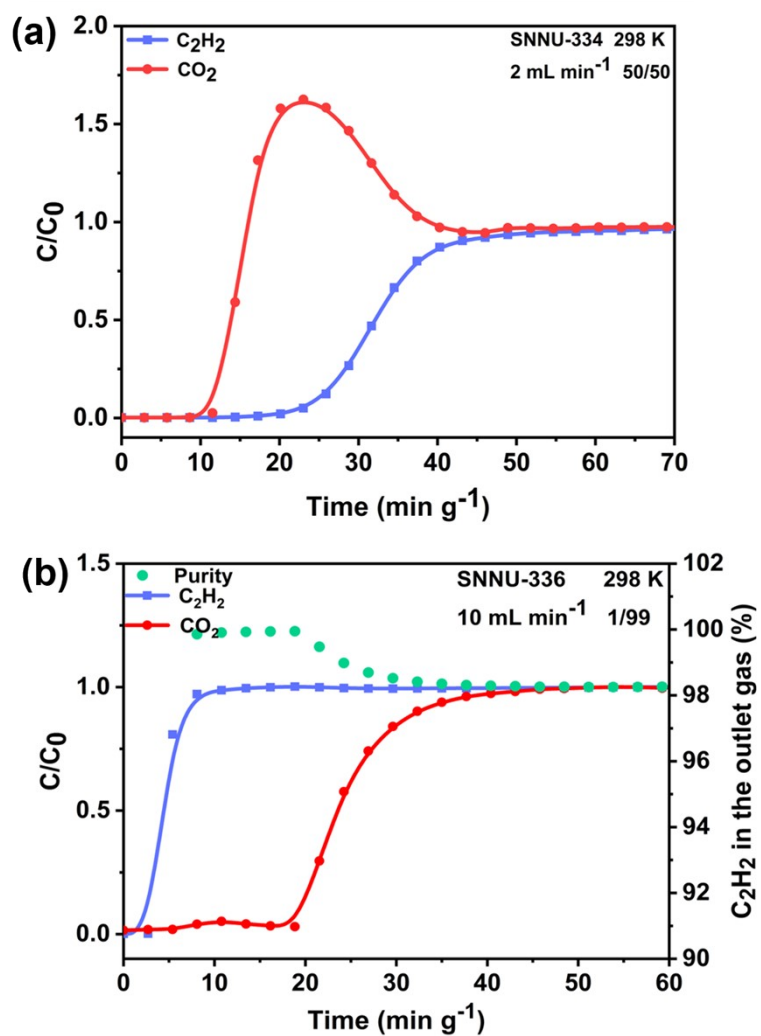

**Figure S15.** Experimental breakthrough curves of SNNU-334: (a)  $\text{CO}_2/\text{C}_2\text{H}_2 = 50/50$  and (b)  $\text{CO}_2/\text{C}_2\text{H}_2 = 1/99$  at 298 K.

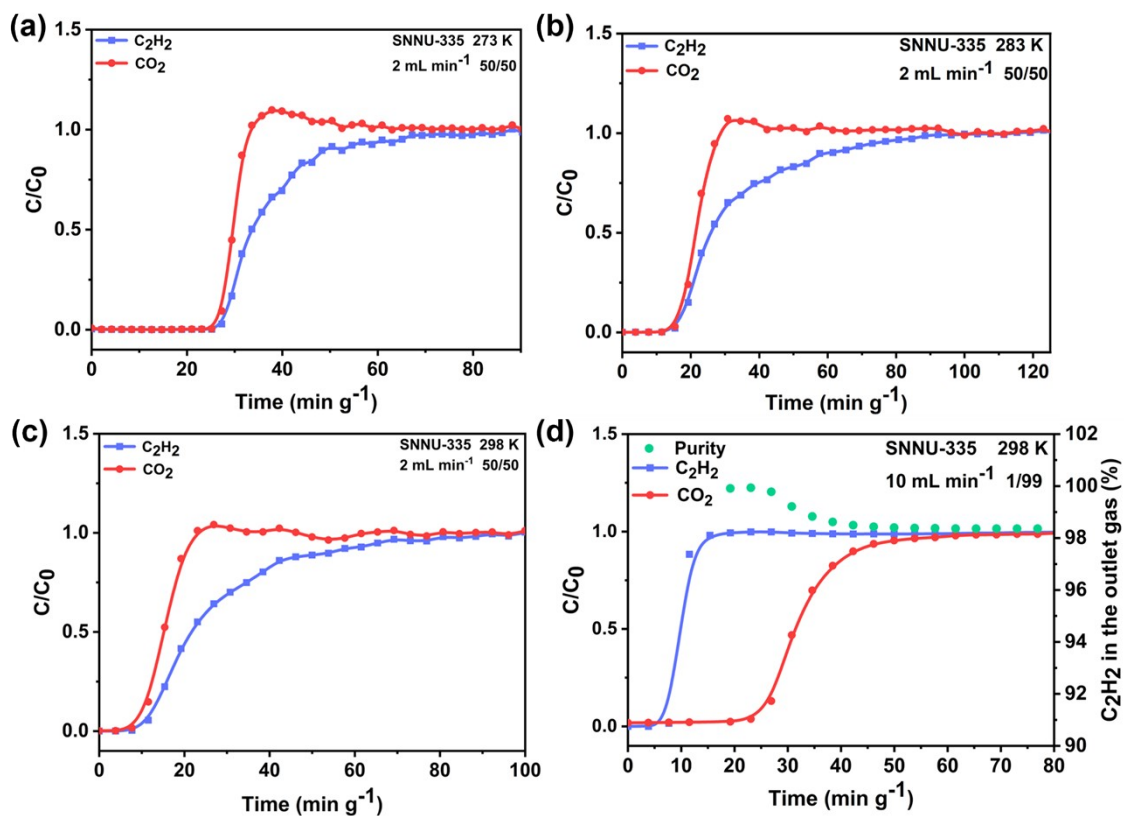

**Figure S16.** Experimental breakthrough curves of SNNU-335: (a)  $\text{CO}_2/\text{C}_2\text{H}_2 = 50/50$  at 273 K; (b)  $\text{CO}_2/\text{C}_2\text{H}_2 = 50/50$  at 283 K; (c)  $\text{CO}_2/\text{C}_2\text{H}_2 = 50/50$  at 298 K; (d)  $\text{CO}_2/\text{C}_2\text{H}_2 = 1/99$  at 298 K.

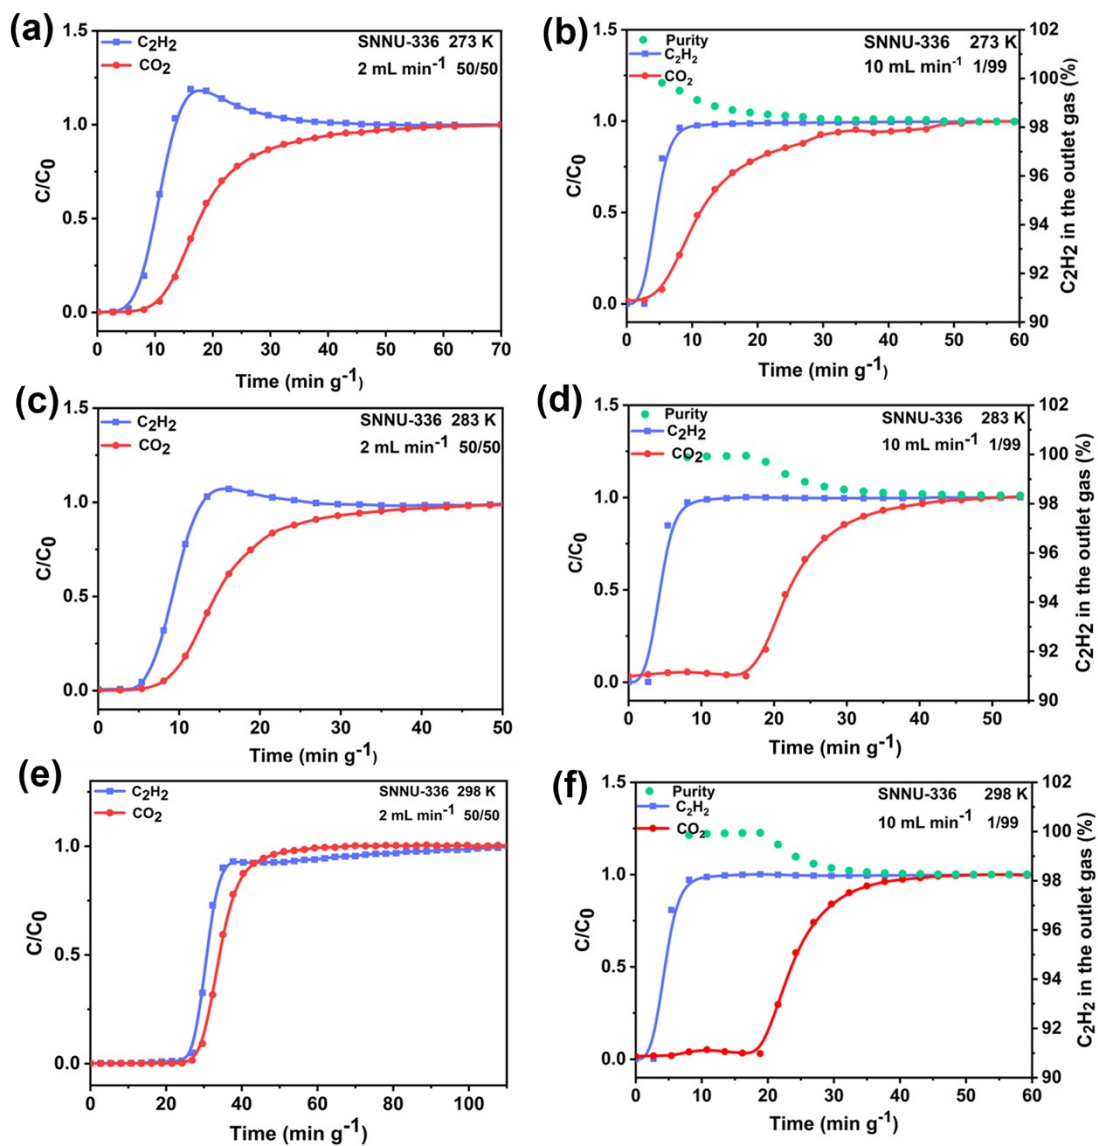

**Figure S17.** Experimental breakthrough curves of SNNU-336: (a)  $\text{CO}_2/\text{C}_2\text{H}_2 = 50/50$  at 273 K; (b)  $\text{CO}_2/\text{C}_2\text{H}_2 = 1/99$  at 273 K; (c)  $\text{CO}_2/\text{C}_2\text{H}_2 = 50/50$  at 283 K; (d)  $\text{CO}_2/\text{C}_2\text{H}_2 = 1/99$  at 283 K; (e)  $\text{CO}_2/\text{C}_2\text{H}_2 = 50/50$  at 298 K; (f)  $\text{CO}_2/\text{C}_2\text{H}_2 = 1/99$  at 298 K.

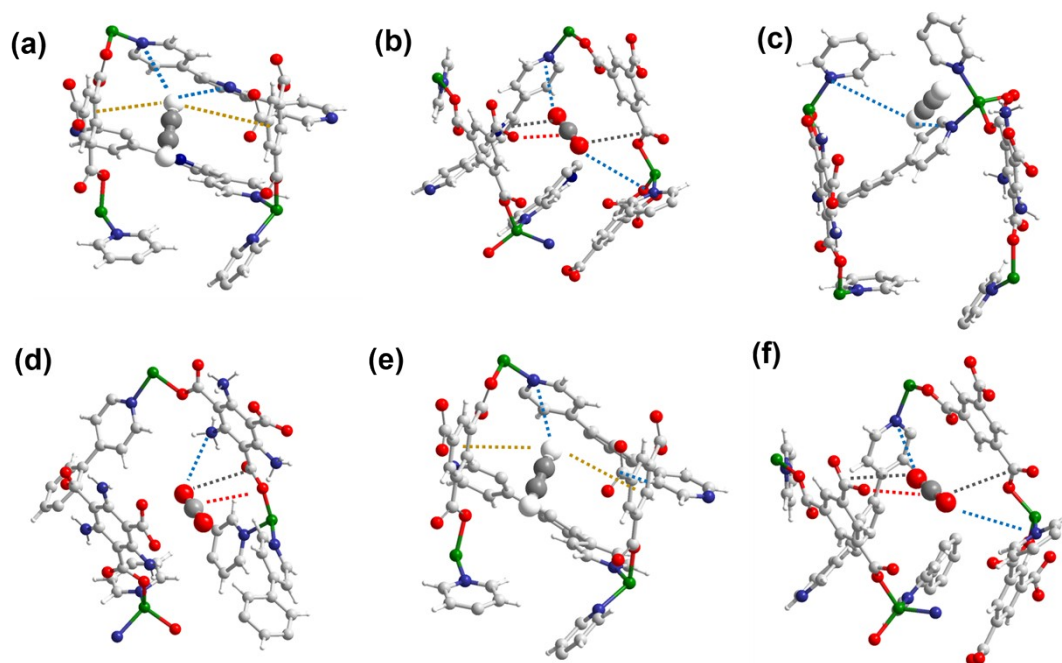

**Figure S18.** GCMC simulation of interactions between the MOF framework and gas molecule:  $C_2H_2$  in SNNU-334-336 (a, c, and e) and  $CO_2$  in SNNU-334-336 (b, d, f).

**Table S3.** Summary of CO<sub>2</sub> and C<sub>2</sub>H<sub>2</sub> uptake capacity and the IAST CO<sub>2</sub>/C<sub>2</sub>H<sub>2</sub> selectivity for MOF adsorbents with inverse C<sub>2</sub>H<sub>2</sub>/CO<sub>2</sub> separation performance.

| MOFs                                                                                                      | CO <sub>2</sub> /C <sub>2</sub> H <sub>2</sub><br>IAST<br>Selectivity<br>(50/50) | CO <sub>2</sub><br>Uptake<br>Capacity<br>(cm <sup>3</sup> g <sup>-1</sup> ) | C <sub>2</sub> H <sub>2</sub><br>Uptake<br>Capacity<br>(cm <sup>3</sup> g <sup>-1</sup> ) | Reference        |
|-----------------------------------------------------------------------------------------------------------|----------------------------------------------------------------------------------|-----------------------------------------------------------------------------|-------------------------------------------------------------------------------------------|------------------|
| Cu-F-pymo                                                                                                 | >10 <sup>5a</sup>                                                                | 26.6                                                                        | 2.3                                                                                       | S1               |
| <b>SNNU-334</b>                                                                                           | <b>3595.4<sup>b</sup></b>                                                        | <b>85.1</b>                                                                 | <b>66.8</b>                                                                               | <b>This Work</b> |
| PMOF-1                                                                                                    | 694 <sup>b</sup>                                                                 | 53.3                                                                        | 7.5                                                                                       | S2               |
| MUF-16                                                                                                    | 510 <sup>c</sup>                                                                 | 47.8                                                                        | 4.0                                                                                       | S3               |
| Cd-NP                                                                                                     | 86 <sup>a</sup>                                                                  | 58                                                                          | 9.7                                                                                       | S4               |
| Ce-MIL-140-4F                                                                                             | 40 <sup>b</sup>                                                                  | 151.7                                                                       | 53.5                                                                                      | S5               |
| [Tm <sub>2</sub> (OH-BDC) <sub>2</sub> (μ <sub>3</sub> -OH) <sub>2</sub> ](H <sub>2</sub> O) <sub>2</sub> | 18.2 <sup>a</sup>                                                                | 130.6                                                                       | 47.0                                                                                      | S6               |
| Mn(bdc)(dpe)                                                                                              | 9.0 <sup>c</sup>                                                                 | 45.9                                                                        | 7.3                                                                                       | S7               |
| SIFSIX-3-Ni                                                                                               | 7.5 <sup>a</sup>                                                                 | 62.7                                                                        | 73.9                                                                                      | S8               |
| <b>SNNU-335</b>                                                                                           | <b>6.9<sup>b</sup></b>                                                           | <b>78.4</b>                                                                 | <b>63.0</b>                                                                               | <b>This Work</b> |
| PCP-NH <sub>2</sub> -ipa                                                                                  | 6.4 <sup>a</sup>                                                                 | 72                                                                          | 43.4                                                                                      | S9               |
| CD-MOF-2                                                                                                  | 6.1 <sup>a</sup>                                                                 | 59.8                                                                        | 45.5                                                                                      | S10              |
| PCP-NH <sub>2</sub> -bdc                                                                                  | 4.4 <sup>a</sup>                                                                 | 68                                                                          | 42.7                                                                                      | S9               |
| K <sub>2</sub> [Cr <sub>3</sub> O(OOCH) <sub>6</sub> ]                                                    | 5.6 <sup>d</sup>                                                                 | 11.2                                                                        | 2.4                                                                                       | S11              |
| CD-MOF-1                                                                                                  | 3.4 <sup>a</sup>                                                                 | 64.3                                                                        | 49.9                                                                                      | S10              |
| [Zn(atz)(BDC-Cl <sub>4</sub> ) <sub>0.5</sub> ] <sub>n</sub>                                              | 2.4 <sup>c</sup>                                                                 | 34.6                                                                        | 18                                                                                        | S12              |
| <b>SNNU-336</b>                                                                                           | <b>1.7<sup>b</sup></b>                                                           | <b>92.7</b>                                                                 | <b>65.3</b>                                                                               | <b>This Work</b> |
| [Tm <sub>2</sub> (OH-BDC) <sub>2</sub> (μ <sub>3</sub> -OH) <sub>2</sub> ]                                | 1.6 <sup>a</sup>                                                                 | 139.1                                                                       | 117.6                                                                                     | S6               |

IAST selectivity for equimolar mixture: a-298 K, 101 KPa; b-273 K, 101 KPa; c-293 K, 101 KPa; d-273 K, 91 KPa; 293 K, 101 KPa; e-285 K, 101 KPa.

## References

- S1. Y. Shi, Y. Xie, H. Cui, Y. Ye, H. Wu, W. Zhou, H. Arman, R. B. Lin and B. Chen, *Adv. Mater.*, 2021, **33**, e2105880.
- S2. L. Z. Cai, Z. Z. Yao, S. J. Lin, M. S. Wang and G. C. Guo, *Angew. Chem. Int. Ed.*, 2021, **60**, 18223-18230.
- S3. O. T. Qazvini, R. Babarao and S. G. Telfer, *Nat. Commun.*, 2021, **12**, 197.
- S4. Y. Xie, H. Cui, H. Wu, R. B. Lin, W. Zhou and B. Chen, *Angew. Chem. Int. Ed.*, 2021, **60**, 9604-9609.
- S5. Z. Zhang, S. B. Peh, R. Krishna, C. Kang, K. Chai, Y. Wang, D. Shi and D. Zhao, *Angew. Chem. Int. Ed.*, 2021, **60**, 17198-17204.
- S6. D. Ma, Z. Li, J. Zhu, Y. Zhou, L. Chen, X. Mai, M. Liufu, Y. Wu and Y. Li, *J. Mater. Chem. A*, 2020, **8**, 11933-11937.
- S7. M. L. Foo, R. Matsuda, Y. Hijikata, R. Krishna, H. Sato, S. Horike, A. Hori, J. Duan, Y. Sato, Y. Kubota, M. Takata and S. Kitagawa, *J. Am. Chem. Soc.*, 2016, **138**, 3022-3030.
- S8. K.-J. Chen, Hayley S. Scott, David G. Madden, T. Pham, A. Kumar, A. Bajpai, M. Lusi, Katherine A. Forrest, B. Space, John J. Perry and Michael J. Zaworotko, *Chem.*, 2016, **1**, 753-765.
- S9. Y. Gu, J.-J. Zheng, K.-i. Otake, M. Shivanna, S. Sakaki, H. Yoshino, M. Ohba, S. Kawaguchi, Y. Wang, F. Li and S. Kitagawa, *Angew. Chem. Int. Ed.*, 2021, **60**, 11688-11694.
- S10. L. Li, J. Wang, Z. Zhang, Q. Yang, Y. Yang, B. Su, Z. Bao and Q. Ren, *ACS. Appl. Mater. Interfaces*, 2019, **11**, 2543-2550.
- S11. R. Eguchi, S. Uchida and N. Mizuno, *Angew. Chem. Int. Ed.*, 2012, **51**, 1635-1639.
- S12. X.-Y. Li, Y. Song, C.-X. Zhang, C.-X. Zhao and C. He, *Sep. Purif. Technol.*, 2021, **279**, 119608.
